# Supplementary material for: Personalized matched targeted therapy in advanced pancreatic cancer: a pilot cohort analysis
Source: PubMed Central journal article supplement (PMC9860045; doi:10.1038/s41525-022-00346-5), 2023-01-20

**Supplementary Table 1: Comparison of characteristics for patients with matching score <50% versus ≥50% and first versus second line or greater.**

| <b>Characteristics</b>                               | <b>Matching Score &lt;50% (N = 7)</b> | <b>Matching Score ≥50% (N = 11)</b> | <b>P value</b> |
|------------------------------------------------------|---------------------------------------|-------------------------------------|----------------|
| <b>Age &gt; 67 years* (N (%))</b>                    | 3 (42.8%)                             | 6 (54.5%)                           | 1.0            |
| <b>Number of men (N (%))</b>                         | 3 (42.9%)                             | 4 (36.4%)                           | 1.0            |
| <b>Matched therapy as first line therapy (N (%))</b> | 1 (14.2%)                             | 4 (36.4%)                           | 0.60           |
|                                                      | <b>1<sup>st</sup> line of therapy</b> | <b>Later lines</b>                  |                |
| <b>Matching score ≥ 50%</b>                          | 4/5 (80%)                             | 7/13 (54%)                          | 0.3            |

\*Age 67 was the median age of the overall cohort.

**Supplementary Table 2:** Molecular alterations and agents administered for 13 patients who did not achieve clinical benefit

| <b>Molecular alterations</b>                                                                                                                                   | <b>Drugs Administered</b>                         | <b>Matching Score (%)<br/>≥50% versus &lt;50%</b> |
|----------------------------------------------------------------------------------------------------------------------------------------------------------------|---------------------------------------------------|---------------------------------------------------|
| <i>CDKN2A</i> alteration<br><i>KRASG12V</i><br><i>TP53</i> mutation                                                                                            | Palbociclib and trametinib                        | ≥50%                                              |
| <i>CDKN2A</i> alteration<br>GNASR201H<br><i>KRAS G12D</i><br><i>TP53</i> mutation                                                                              | Palbociclib and trametinib                        | ≥50%                                              |
| <i>CDKN2A</i> alteration<br><i>ERBB2</i> amplification<br><i>KRAS G12D</i>                                                                                     | Palbociclib and trametinib                        | ≥50%                                              |
| <i>CDKN2A</i> alteration<br>GNASR201C<br><i>KRAS Q61H</i><br><i>SMAD4</i> alteration                                                                           | Palbociclib and trametinib                        | ≥50%                                              |
| Alterations in<br><i>CDKNA</i> , <i>CCND1</i> , <i>CCNE1</i> , <i>KRAS</i>                                                                                     | Palbociclib, trametinib, and bevacizumab          | ≥50%                                              |
| Alterations in <i>CDKN2A</i> , <i>KRAS</i> , <i>TP53</i>                                                                                                       | Palbociclib, trametinib, and bevacizumab          | ≥50%                                              |
| <i>MDM2</i> amplification<br>Alterations in <i>AKT2</i> , <i>AXL</i> , <i>KRAS</i> , <i>TP53</i> ,                                                             | Trametinib and everolimus                         | <50%                                              |
| <i>CDKNA</i> loss<br>Alterations in <i>BRCA2</i> ,<br><i>IRS2</i> , <i>KRAS</i> . <i>SMAD4</i> , <i>TP53</i>                                                   | Olaparib and trametinib                           | <50%                                              |
| Alterations in<br><i>BRCA1</i> , <i>KRAS</i> , <i>MEN1</i> , <i>MSH6</i>                                                                                       | Oxaliplatin* and capecitabine                     | <50%                                              |
| <i>CDKNA</i> loss<br>Alterations in <i>ARID1A</i> , <i>BRCA1</i> , <i>CDKN1B</i> , <i>ERBB2</i> ,<br><i>KRAS</i> , <i>TP53</i>                                 | Olaparib                                          | <50%                                              |
| Alteration in <i>ATM</i> , <i>CCND2</i> , <i>CDH1</i> , <i>FGFR2</i> , <i>FGF23</i> ,<br><i>GNAS</i> , <i>MYC</i> , <i>NOTCH1</i> , <i>SMAD4</i> , <i>TP53</i> | Erlotinib, cetuximab, palbociclib, and trametinib | <50%                                              |
| Alterations in<br><i>CDK4</i> , <i>CDKN2A</i> , <i>ERBB2</i> , <i>ERBB3</i> , <i>GLI1</i> , <i>KRAS</i> , <i>TP53</i>                                          | Trastuzumab and pertuzumab                        | <50%                                              |
| <i>BRAF V600E</i><br>Alterations in <i>CDH1</i> , <i>TP53</i> ,                                                                                                | Trametinib and erlotinib                          | <50%                                              |

\*Platinum agents target DNA repair and hence were considered as matched targeted agents for *BRCA*-mutant tumors

**Supplementary Figure 1:** Consort Diagram: A total of 123 patients with pancreatic cancer had NGS results in the database.

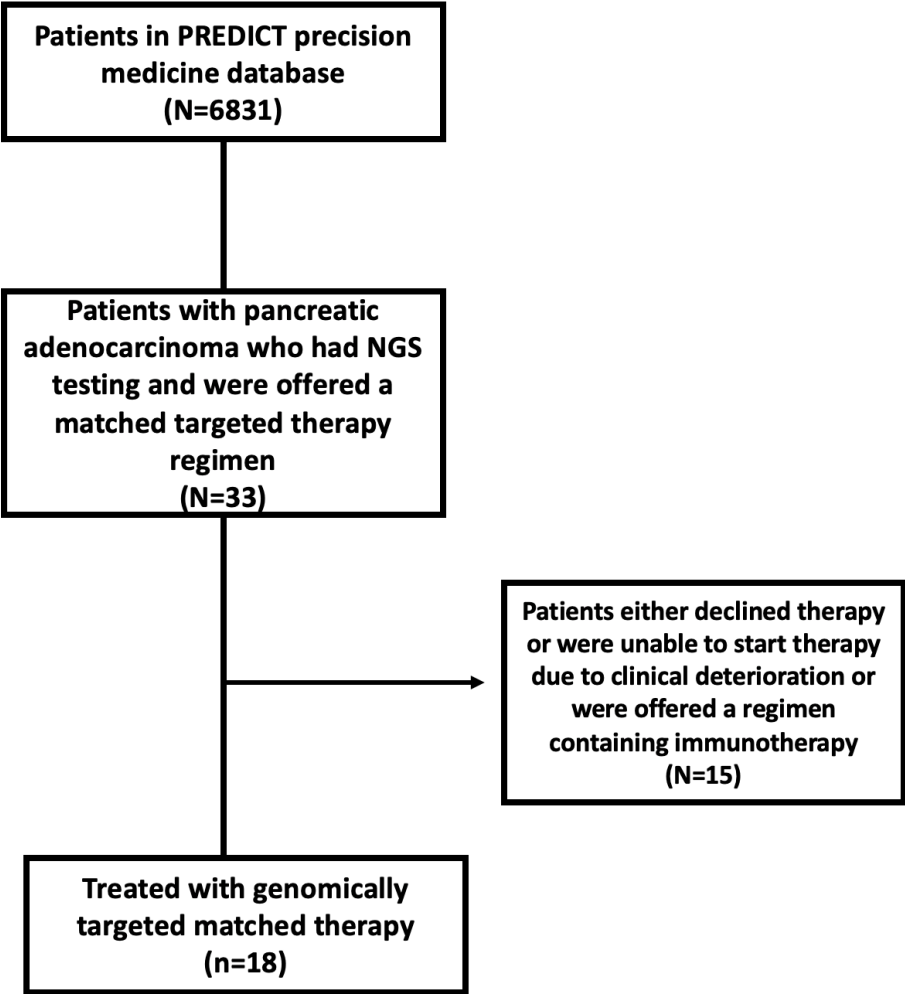

Supplement: 41525_2022_346_MOESM1_ESM.pdf [file 41525_2022_346_MOESM1_ESM.pdf]
